# Supplementary material for: Epigenetic silencing of miR-181c by DNA methylation in glioblastoma cell lines
Source: Springer Nature journal article supplement (doi:10.1186/s12885-016-2273-6), 2016-03-16
Supplement: MOESM1 [file 9746320]

## Additional file 1

Epigenetic silencing by DNA methylation of the miR-181c in glioblastoma cell lines

Erandi Ayala-Ortega, Rodrigo Arzate-Mejía, Rosario Pérez-Molina, Edgar González-Buendía,  
Karin Meier, Georgina Guerrero and Félix Recillas-Targa\*

Instituto de Fisiología Celular, Departamento de Genética Molecular, Universidad Nacional  
Autónoma de México, Ciudad de México, México

\* Corresponding author: Félix Recillas-Targa  
Instituto de Fisiología Celular  
Departamento de Genética Molecular  
Universidad Nacional Autónoma de México  
Circuito Exterior S/N  
Ciudad Universitaria  
México D.F. 04510  
México  
Phone: (52 55) 56 22 56 74  
FAX: (52 55) 56 22 56 30  
Email: [frecilla@ifc.unam.mx](mailto:frecilla@ifc.unam.mx)

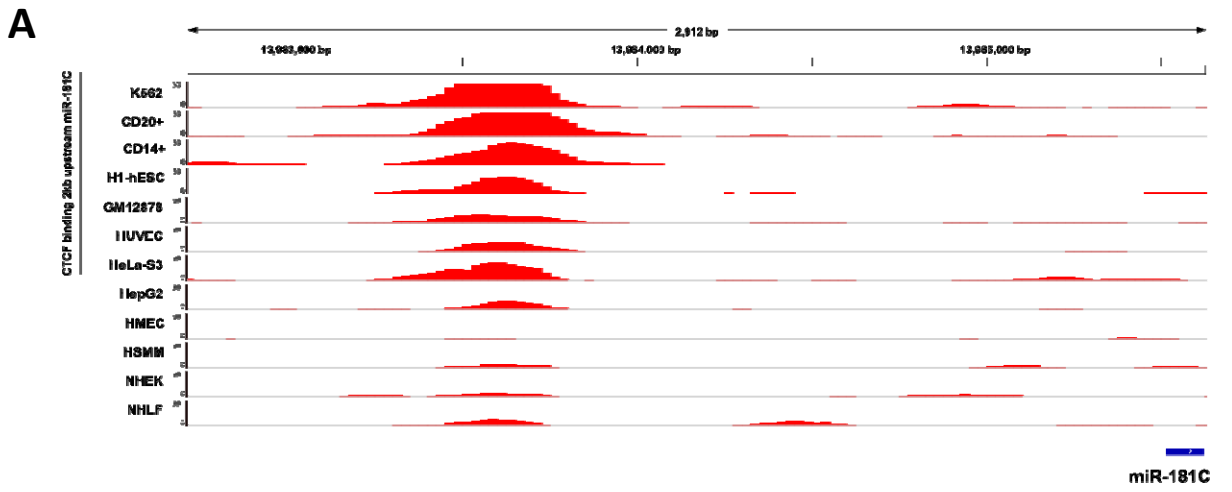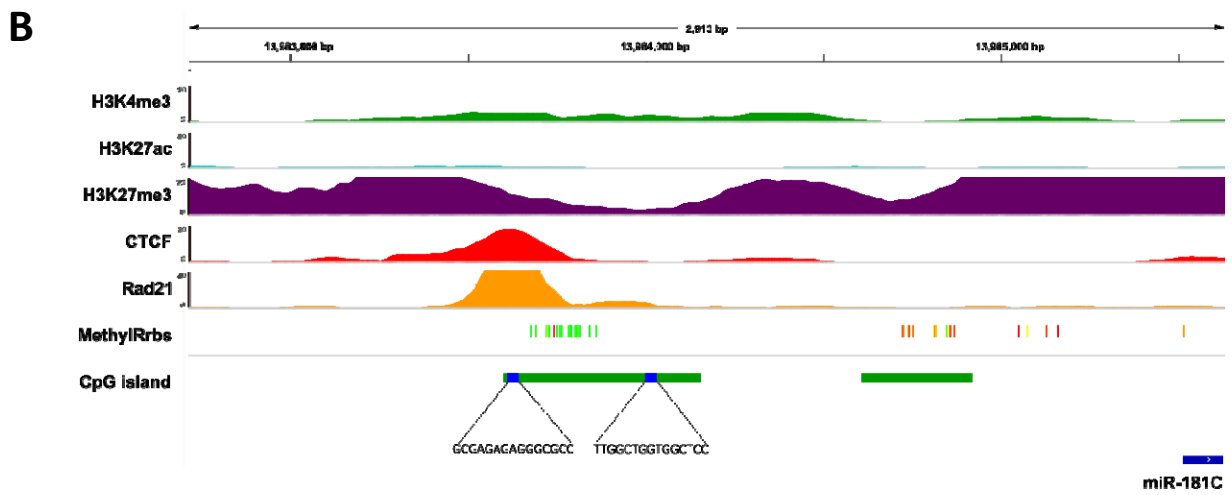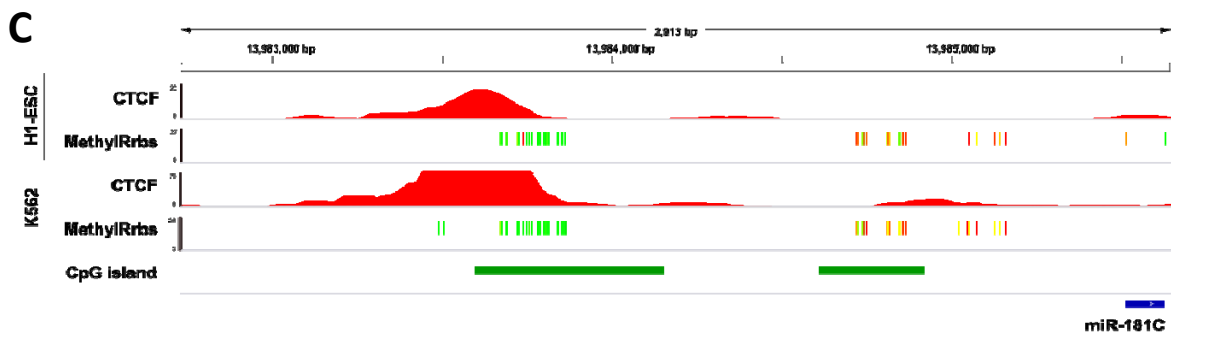

**Figure S1.** CTCF binds to the promoter of *miR-181c* in different cell lines. (a) IGV genome browser screen shot for ChIP-seq data of CTCF in 12 different cell lines. Signal tracks are displayed for each cell line. (b) IGV genome browser screenshot for ChIP-seq data of H3K4me3, H3K27ac, H3K27me3, CTCF and Rad21 from H1-hESC cells and Reduced Representation Bisulfite Sequencing (RRBS) data from the same cell line. Green bars, 0% molecules sequenced are methylated; Yellow bars, 50% molecules are methylated; Red bars, 100% molecules sequenced are methylated. CTCF binding motifs with the highest scores are shown with reference to one CpG island. (c) IGV genome browser screenshot of RRBS data from H1-hESC and K562 cells. ChIP-seq data of CTCF generated from H1-hESC and K562 cells. Data was downloaded from the Analysis/Data hub by the ENCODE project.

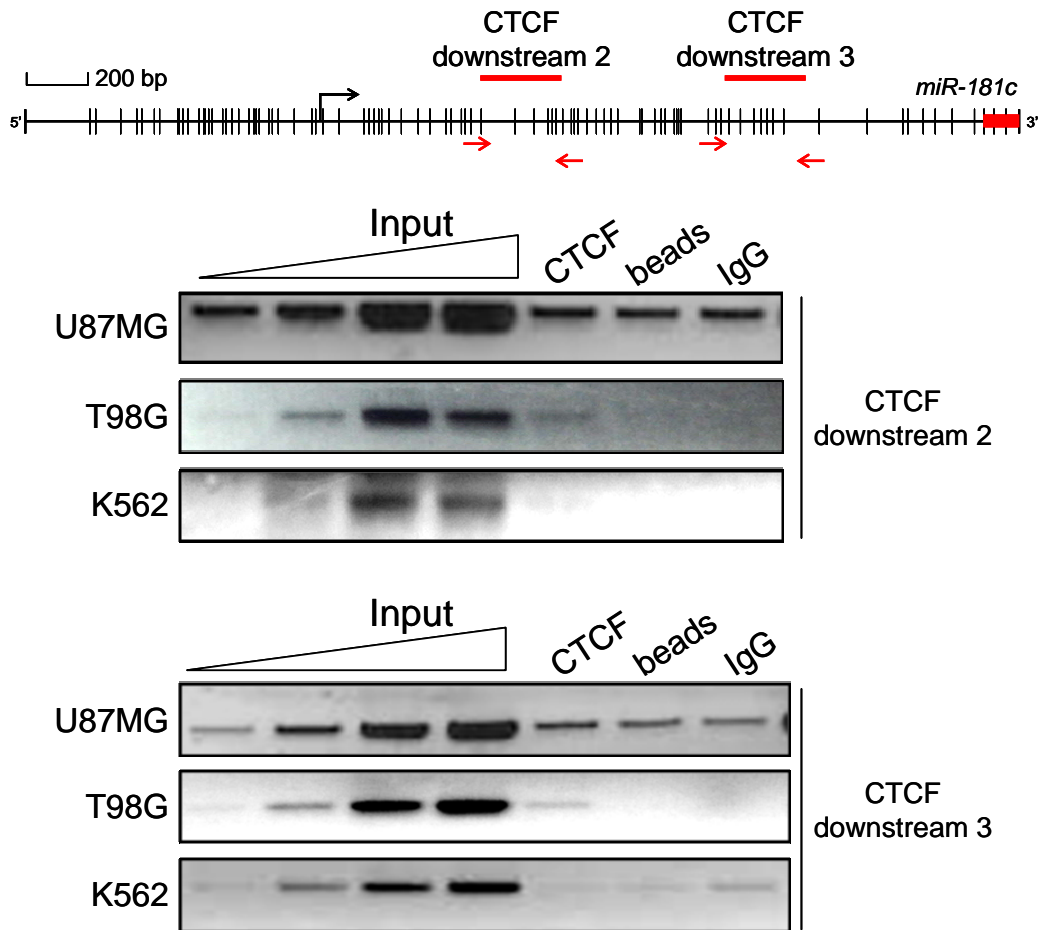

**Figure S2. *In vivo* CTCF association in the promoter region of the miR-181c.** Chromatin immunoprecipitation of CTCF in U87MG, T98G glioblastoma cells and K562 erythroleukemic cells are shown. The enrichment was evaluated in what we designated as the CTCF-downstream 2 and the CTCF-downstream 3, that are predicted CTCF binding. The red arrows of the scheme show the location of primers used for RCR amplification. The linear range of Input DNA amplification products is shown. *Igf2/H19* DMR was used as a positive control for CTCF *in vivo* enrichment (see Fig. 3). This set of data is representative of at least three-independent experiments.

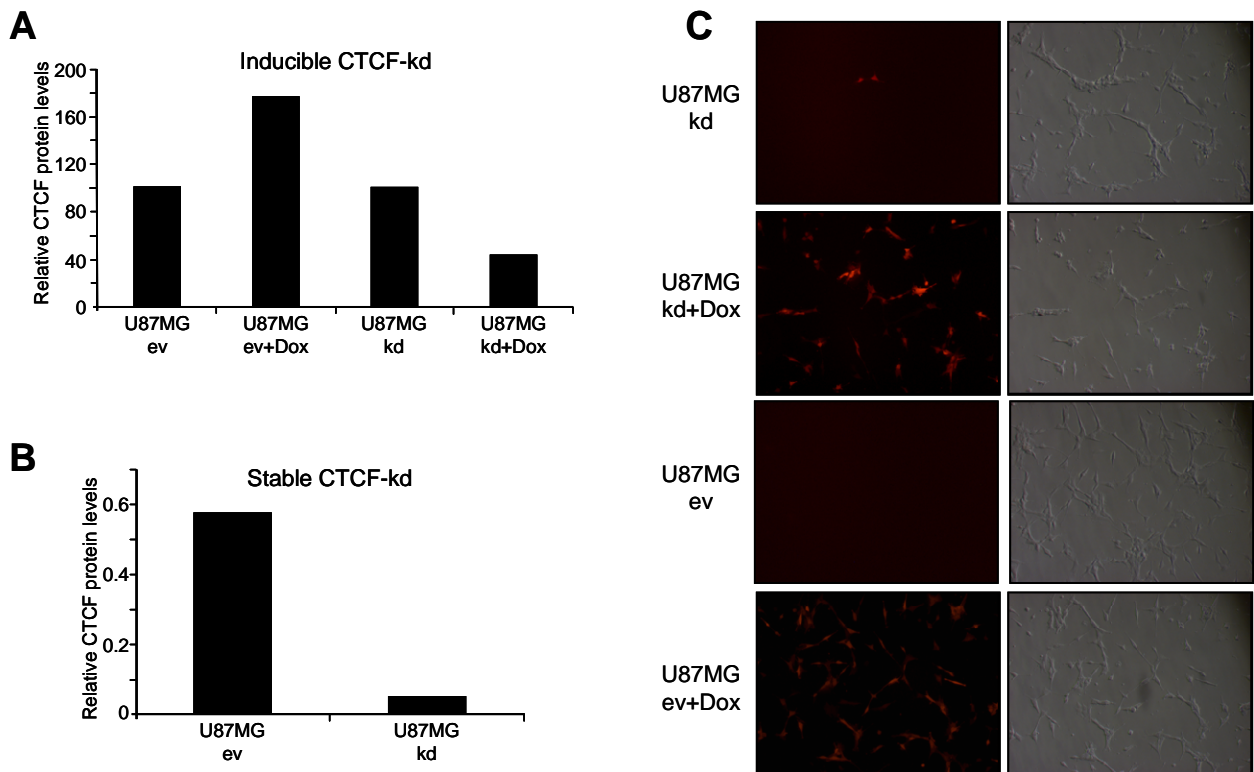

**Figure S3.** Quantization of the inducible CTCF knockdown in the U87MG glioblastoma cells. (a) and (b) represent the relative enrichment of the CTCF protein in the inducible knockdown and the stable knockdown, respectively. (c) Immunofluorescence of the U87MG cells using an antibody against human CTCF in the context of the inducible shRNAi knockdown against CTCF. Ev: Empty vector, ev+Dox: Empty vector with induction with doxycyclin, kd: Knockdown without induction and kd+Doc: Induced knockdown.

| Peak 2 kb upstream <i>miR-181c</i> | No peak 2 kb upstream <i>miR-181c</i> |
|------------------------------------|---------------------------------------|
| A549                               | AoAF                                  |
| AG04449                            | Caco-2                                |
| BJ                                 | Gliobla                               |
| FIBROBLAST                         | GM12801                               |
| GM06990                            | GM12865                               |
| GM12864                            | GM12872                               |
| GM12874                            | GM12873                               |
| GM12878                            | GM12875                               |
| H1-hESC                            | HA-sp                                 |
| HBMEC                              | HCFaa                                 |
| HCPEpiC                            | HEK293                                |
| HEEpiC                             | HepG2                                 |
| HeLa-S3                            | HL-60                                 |
| HMF                                | HMEC                                  |
| HPF                                | HPAF                                  |
| HRPEpiC                            | HSMM                                  |
| HRE                                | HSMMtube                              |
| K562                               | MCF-7                                 |
| HUVEC                              | NH-A                                  |
| NHDF-Ad                            | NHEK                                  |
| ProgFib                            | SK-N-SH_RA                            |
| Osteobl                            | T-47D                                 |
|                                    | WERI-Rb-1                             |

**Table S1. CTCF binds to the promoter of mir181C in different cell lines.** Peak data from 47 cells lines was download in IGV from the Analysis Data hub by the ENCODE project. Peaks were identified by MACS as part of the ENCODE analysis pipeline. 22 cells lines have a significantly enriched binding region for CTCF upstream of the mature sequence for miR-181c.
